# Supplementary material for: A CRISPR Screen Reveals Resistance Mechanisms to CD3-Bispecific Antibody Therapy
Source: Oxford University Press journal article supplement (doi:10.1158/2326-6066.cir-20-0080), 2020-11-11
Supplement: 23266066cir200080-sup-236405_2_supp_6483716_q4mhbt.xlsx [file 23266066cir200080-sup-236405_2_supp_6483716_q4mhbt.xlsx]

## Sheet: Sheet1
Application	Target	Vendor	Catalog #	Dilution in application
FACS	B2M-FITC	Biolegend	316304	1:200
FACS	CAS9	Cell Signaling	14697S	1:200
FACS	CD123-APC	Biolegend	306012	1:200
FACS	CD235a-BV421	BD Biosciences	562938	1:200
FACS	CD303-BV421	BD Biosciences	8274743	1:200
FACS	CD34-PE	Biolegend	343606	1:200
FACS	CD3-AF488	Biolegend	300320	1:200
FACS	CD3-BUV395	BD Biosciences	564001	1:200
FACS	CD71-BV650	Biolegend	334116	1:200
FACS	FAS-BV421	Biolegend	305624	1:200
FACS	HLA-DR-BV650	BD Biosciences	564231	1:200
FACS	ICAM1-FITC	Biolegend	353108	1:200
FACS	LCA-FITC	Vector Labs	FL-1041-5	1:200
FACS	LiveDead-AF780	Invitrogen	65-0865-14	1:1000
FACS	mouse Fc-AF647	Invitrogen	A21237	1:1000
FACS	pSTAT1	Cell Signaling	9167S	1:100
FACS	rabbit Fc-AF647	Invitrogen	A21244	1:1000
Western Blot	ACTB	Invitrogen	MA1-140	1:1000
Western Blot	CASP3	Cell Signaling	9665S	1:500
Western Blot	CASP7	Cell Signaling	9492S	1:500
Western Blot	CASP8	Cell Signaling	9746S	1:500
Western Blot	CASP9	Cell Signaling	9508S	1:500
Western Blot	CD123	Biolegend	306002	1:500
Western Blot	FUT8	Sigma	HPA043410	1:500
Western Blot	GAPDH	Invitrogen	MAS-15738	1:1000
Western Blot	His-HRP	R&D systems	MAB050H	1:10000
Western Blot	human Fc-HRP	Invitrogen	A18817	1:10000
Western Blot	JAK1	Cell Signaling	3332S	1:500
Western Blot	LCA-HRP	Cosmo Bio	J407	1:500
Western Blot	mouse Fc-HRP	Invitrogen	A16072	1:10000
Western Blot	pSTAT5	Cell Signaling	4322S	1:500
Western Blot	PTPN2	Cell Signaling	58935S	1:500
Western Blot	rabbit Fc-HRP	Invitrogen	A27036	1:10000
Western Blot	STAT1	Cell Signaling	14994S	1:500
Western Blot	STAT5	Cell Signaling	25656S	1:500
