# Supplementary material for: A CRISPR Screen Reveals Resistance Mechanisms to CD3-Bispecific Antibody Therapy
Source: Oxford University Press journal article supplement (doi:10.1158/2326-6066.cir-20-0080), 2020-11-11
Supplement: 23266066cir200080-sup-236405_2_supp_6483717_qzmhbt.xlsx [file 23266066cir200080-sup-236405_2_supp_6483717_qzmhbt.xlsx]

## Sheet: Resistance Hits
Cutoff: -log10 P value >2
MOLM13					SEM					HCC827
GENE_NAME	P_VAL	log2_FOLD_CHANGE	-log10_P_VAL		GENE_NAME	P_VAL	log2_FOLD_CHANGE	-log10_P_VAL		GENE_NAME	P_VAL	log2_FOLD_CHANGE	-log10_P_VAL
ABCD4	0.000154437	0.489106	3.81125		ACSL4	0.00215616	0.235193	2.66632		CTNND1	0.00557913	0.778604	2.25343
ANGPT2	9.77028e-05	0.371291	4.01009		ACVR1	0.000151017	0.397176	3.82098		IL6ST	0.000112262	0.639294	3.94977
ATP13A3	4.74275e-05	0.447595	4.32397		ALCAM	7.89265e-05	0.456075	4.10278		MTOR	0.00167409	0.637914	2.77622
ATP5SL	0.00083793	0.589958	3.07679		ARID4B	0.00213099	0.338916	2.67142		CDH3	0.00401778	0.631482	2.39601
BID	0.00246524	0.442309	2.60814		ATXN2L	0.00605408	0.262465	2.21795		GFM1	0.00172881	0.615673	2.76225
CHD1	9.04698e-05	0.434736	4.0435		BAHCC1	0.00978585	0.223489	2.0094		CUL3	0.000982028	0.591409	3.00788
CHUK	0.00369307	0.651733	2.43261		BMPR1A	0.000188825	0.422246	3.72394		RRAGC	0.000188976	0.581954	3.72359
DAZAP1	0.00163372	0.478534	2.78682		BMPR2	0.00345755	0.393287	2.46123		KDM1A	0.000211195	0.576406	3.67532
EHBP1L1	0.00650138	0.316121	2.18699		C11orf30	0.000668174	0.490002	3.17511		EP300	0.00391105	0.543047	2.40771
ENPP6	0.00683161	0.282607	2.16548		CADM1	0.00116125	0.650921	2.93507		JAK1	0.0097007	0.542321	2.0132
FBXO11	0.00244012	0.46899	2.61259		CALM2	0.00336953	0.684193	2.47243		CASP8	5.94233e-05	0.534309	4.22604
FNDC3B	0.00199714	0.711043	2.69959		CASP8	4.56024e-07	1.94514	6.34101		MRPL37	0.00936985	0.531156	2.02827
FUT8	0.00287589	0.836368	2.54123		CCDC22	0.00950158	0.192672	2.0222		TFAM	0.00386725	0.521643	2.4126
GMDS	6.01395e-05	0.968478	4.22084		CD58	0.000133529	0.601634	3.87442		BCS1L	0.00275931	0.475591	2.5592
GPR152	0.00286458	0.265007	2.54294		CEBPA	0.000495374	0.601512	3.30507		KLHL9	0.00368865	0.473259	2.43313
GRIK3	0.00842995	0.333753	2.07417		CEBPB	0.00242622	0.437753	2.61507		NDUFV2	0.000266183	0.463201	3.57482
GSK3A	0.00699754	0.421483	2.15505		CMTM6	0.00170589	0.528227	2.76805		MARS2	0.000307822	0.454801	3.5117
GTF2I	0.00925894	0.454111	2.03344		CPE	0.000589676	0.247859	3.22939		ELF3	0.00361253	0.445378	2.44219
HNRNPU	0.00593595	0.390537	2.22651		CRTAM	0.00620153	0.14216	2.2075		ABCD4	0.00361925	0.440352	2.44138
HSH2D	0.000440893	0.361434	3.35567		CTSK	0.00851623	0.272237	2.06975		OPA1	0.00151054	0.43649	2.82087
ICAM1	0.00599816	1.53528	2.22198		DCAF5	0.00326732	0.2162	2.48581		MRPS2	0.00261537	0.428049	2.58247
IFNGR1	9.9869e-05	0.994711	4.00057		DOLPP1	0.00233477	0.422075	2.63176		MTG2	0.000182275	0.425821	3.73927
IFNGR2	0.00215891	1.6016	2.66577		ELMSAN1	0.00435847	0.295559	2.36067		MRPS18C	0.00725622	0.421331	2.13929
IL3RA	0.000680185	0.676033	3.16737		ELOVL5	0.00149646	0.226874	2.82493		MTERF3	0.000656931	0.420396	3.18248
INPP5D	0.00381544	0.266823	2.41846		ENG	0.00794973	0.21127	2.09965		ATP5SL	0.000316719	0.414386	3.49933
JAK1	0.000186156	1.6295	3.73012		FADD	2.83062e-05	1.64629	4.54812		MRPL3	0.000285746	0.411531	3.54402
JAK2	0.000127536	1.32373	3.89437		FAM13B	0.00633455	0.427799	2.19828		TELO2	0.00680471	0.398841	2.16719
JKAMP	0.000754008	0.343948	3.12262		FAM3A	0.00932874	0.216399	2.03018		C10orf2	0.000568638	0.398141	3.24516
KMT2D	7.02558e-05	0.426112	4.15332		FAS	0.000370708	0.613599	3.43097		NME6	0.00461996	0.389942	2.33536
KRAS	0.00168385	0.255844	2.7737		FBXL17	0.00037531	0.856021	3.42561		DPM3	0.00218442	0.389748	2.66066
MAT2A	0.000241746	0.400678	3.61664		FBXO11	5.41651e-05	1.17789	4.26628		RACGAP1	0.00317654	0.389027	2.49805
NDUFA9	0.00668519	0.358577	2.17489		FUT8	0.0011549	1.09918	2.93746		CEP63	0.00174532	0.385864	2.75813
NDUFAF7	0.000850194	0.540501	3.07048		GMDS	0.00025177	1.21555	3.599		ATP5C1	0.00461712	0.384996	2.33563
NDUFB5	0.00109438	0.463962	2.96083		HDAC3	6.20519e-05	1.20043	4.20725		RARS	0.000262514	0.382656	3.58085
NUBPL	0.000797159	0.420764	3.09846		HSF2	0.00591329	0.24816	2.22817		INTS10	0.00133241	0.380738	2.87536
PAPOLA	0.000123597	0.55589	3.90799		ICAM1	0.000179273	2.04103	3.74648		GABBR2	0.00190322	0.376346	2.72051
PIGU	0.0012845	0.26299	2.89126		IFNAR2	0.00744344	0.234048	2.12823		MRPL44	0.00169285	0.373189	2.77138
PIN1	0.00817067	0.289028	2.08774		IFNGR1	2.46852e-05	1.61816	4.60756		FASTKD5	0.000149239	0.3715	3.82612
PPP1R27	0.00187213	0.455451	2.72766		IFNGR2	3.98924e-07	1.49612	6.39911		SDHB	0.00718627	0.365246	2.1435
RSC1A1	0.0088197	0.209937	2.05455		IL3RA	0.00106523	0.696808	2.97256		TFB2M	0.00423749	0.364051	2.37289
RTN4IP1	0.00312327	0.353427	2.50539		ING3	0.00734422	0.229857	2.13405		ELP3	0.00171692	0.358941	2.76525
SEC62	0.00916787	0.388973	2.03773		IRF9	0.000785984	0.448857	3.10459		MRPL38	0.001174	0.358616	2.93033
SETDB1	0.00609388	0.342331	2.21511		ITPKB	0.000642153	0.45379	3.19236		NF2	0.00753522	0.358324	2.1229
SHOC2	0.00413029	0.476825	2.38402		JAK1	4.15336e-05	1.7955	4.3816		MRPL47	0.00266406	0.352659	2.57446
SLC35C1	8.49618e-05	0.891509	4.07078		JAK2	2.10447e-05	1.65946	4.67686		RARS2	0.00249947	0.351203	2.60215
SNX5	0.00765263	0.344665	2.11619		JMJD1C	0.00289759	0.52101	2.53796		RBX1	0.000783209	0.350059	3.10612
ST6GAL1	0.00161053	0.379122	2.79303		KBTBD11	0.0097015	0.183839	2.01316		FH	0.00170229	0.346584	2.76897
STAT1	0.00204472	1.60087	2.68937		KBTBD12	0.00590611	0.16692	2.2287		DNAJC18	0.0086763	0.34415	2.06167
SURF4	0.00408965	0.350696	2.38831		KCTD5	0.00182236	0.558384	2.73937		CHCHD4	0.00254361	0.342921	2.59455
TIMMDC1	0.00107592	0.41963	2.96822		KDM5C	1.46193e-05	0.474582	4.83507		COX5A	0.00140014	0.339444	2.85383
TMEM126B	0.00103949	0.496583	2.98318		KHDRBS1	0.00827779	0.329356	2.08209		COX15	0.00631239	0.336142	2.19981
TMEM219	0.0094993	0.319354	2.02231		KPNA2	0.00599244	0.20964	2.2224		VCPIP1	0.00246178	0.335283	2.60875
TMEM261	0.00302575	0.303212	2.51917		LEPROT	0.00275852	0.188002	2.55932		NDUFB10	0.00410796	0.332597	2.38637
TNFRSF1A	5.56143e-05	1.05501	4.25481		MTUS1	0.00577682	0.197671	2.23831		MRPL41	0.00820877	0.331485	2.08572
TNFRSF1B	0.00442314	0.754952	2.35427		NCOR1	0.000147087	0.762523	3.83243		DNAAF3	0.00311482	0.329879	2.50657
TNRC18	0.00675038	0.493556	2.17067		NFKBIZ	0.000905384	0.211114	3.04317		AJUBA	0.00194156	0.329794	2.71185
TP53	1.68565e-09	0.737006	8.77323		PAPOLA	0.00193261	0.235965	2.71386		TRAPPC12	2.26307e-05	0.325602	4.6453
TRIM28	0.00575325	0.447822	2.24009		PCDHGA1	0.00915018	0.259444	2.03857		KIAA0391	0.00140619	0.323363	2.85196
TRIM37	0.00423599	0.320638	2.37304		PDS5A	0.00942046	0.200602	2.02593		NDUFB7	0.00394082	0.321472	2.40441
ZFC3H1	0.00378312	0.464074	2.42215		PHF12	0.00354307	0.487813	2.45062		MTRF1L	0.00166004	0.319617	2.77988
ZNF217	0.00203712	0.439348	2.69098		PIP4K2A	0.00106146	0.293382	2.9741		MRPS15	0.00273766	0.316201	2.56262
					PKN1	0.00289699	0.252107	2.53805		APEX1	0.00973982	0.31577	2.01145
					RAB15	0.00426398	0.249008	2.37018		COX10	0.0070592	0.312121	2.15124
					RBM24	0.00578919	0.21563	2.23738		GPAA1	0.00278222	0.311525	2.55561
					RTP4	0.00295717	0.152237	2.52912		MRPS16	0.00137499	0.305997	2.8617
					SHOC2	0.000863097	0.418718	3.06394		PRMT5	0.0014918	0.305922	2.82629
					SLC35C1	9.40156e-06	1.06962	5.0268		NDUFAF5	0.00297517	0.305137	2.52649
					SMAD4	0.00658337	0.299642	2.18155		UBE2J2	0.00421946	0.304385	2.37474
					SMAD5	0.00452901	0.327765	2.344		HSPA13	0.00356168	0.303402	2.44834
					SNRPA	0.00293604	0.302281	2.53224		COQ7	0.0055681	0.301726	2.25429
					SPPL3	0.000106519	0.894555	3.97257		TEFM	0.00681432	0.301576	2.16658
					STAG1	0.00154826	0.299772	2.81015		RBM28	0.00962084	0.29877	2.01679
					STAT1	0.000681126	1.62228	3.16677		ALCAM	0.000639254	0.295149	3.19433
					SYNCRIP	0.000413004	0.437839	3.38405		TRPM7	0.00243174	0.294702	2.61408
					TBL1XR1	1.32195e-05	1.0868	4.87878		WRB	0.008487	0.29458	2.07125
					TMEM18	0.00788755	0.277687	2.10306		WBSCR16	0.00139209	0.294573	2.85633
					TSPYL1	0.00798884	0.304872	2.09752		AIFM1	0.00040298	0.291119	3.39472
					TYK2	0.00905356	0.273502	2.04318		SNRPA	0.00363403	0.290426	2.43961
					USP32	0.000333782	0.32558	3.47654		CARS2	0.00895495	0.286537	2.04794
					YPEL3	0.00923624	0.210073	2.0345		RTN4IP1	0.006687	0.281588	2.17477
					YTHDF1	0.0023666	0.320824	2.62588		WDR77	0.00111597	0.28095	2.95235
					ZBTB7A	0.000694112	0.369825	3.15857		FAM161B	0.00957336	0.275695	2.01894
					ZCCHC12	0.00452729	0.252616	2.34416		EN2	0.00700035	0.274376	2.15488
					ZMYM3	0.00231439	0.299758	2.63556		NDUFS8	0.00142321	0.272671	2.84673
					ZMYND8	0.000625409	0.358772	3.20384		MRTO4	0.00494566	0.268408	2.30578
										TOP2A	0.000882048	0.267975	3.05451
										CTNNB1	0.0075478	0.251244	2.12218
										EIF2B3	0.00913041	0.243648	2.03951
										NDUFA11	0.00983234	0.243308	2.00734
										MRPL28	0.00647512	0.241179	2.18875
										ALG13	0.00680017	0.23334	2.16748
										PEX1	0.00307017	0.231082	2.51284
										CGB1	0.00689183	0.23036	2.16167
										C9orf91	0.00980769	0.224837	2.00843
										FMO5	0.00379311	0.207628	2.421
										EIF6	0.00674194	0.202958	2.17122
										EIF3I	0.00658085	0.190892	2.18172
										GABPB2	0.0034767	0.190697	2.45883
										COPS4	0.00626386	0.183017	2.20316

## Sheet: Sensitizing Hits
Cutoff: -log10 P value >2
MOLM13					SEM					HCC827
GENE_NAME	P_VAL	log2_FOLD_CHANGE	-log10_P_VAL		GENE_NAME	P_VAL	log2_FOLD_CHANGE	-log10_P_VAL		GENE_NAME	P_VAL	log2_FOLD_CHANGE	-log10_P_VAL
ACACA	0.00213881	-0.496867	2.66983		ACAD9	0.00239773	-0.307469	2.6202		PIGW	0.00497008	-0.173237	2.30364
ACSL3	0.00990466	-0.321039	2.00416		ADAM10	0.0011513	-0.46216	2.93881		DAPL1	0.00714151	-0.181306	2.14621
ADAM10	0.000399089	-0.469169	3.39893		AGO2	0.00299323	-0.305755	2.52386		APLP2	0.00718768	-0.222145	2.14341
ADIPOR2	0.000332968	-1.43775	3.4776		AHDC1	0.00987139	-0.141033	2.00562		CENPB	0.00323686	-0.24168	2.48988
AGK	0.00805201	-0.392567	2.0941		AIFM1	0.000840555	-0.345342	3.07543		CRB3	0.0095146	-0.24229	2.02161
ANKRD33	0.005936	-0.237497	2.22651		ALAD	0.000382644	-0.419347	3.41721		ADAMTS17	0.00424896	-0.250478	2.37172
AP4E1	0.00162768	-0.374642	2.78843		AMD1	0.00139273	-0.38935	2.85613		TSSK6	0.00850173	-0.255864	2.07049
APOOL	0.0061961	-0.257812	2.20788		ANKH	0.000770982	-0.306579	3.11296		EBF4	0.00668358	-0.262687	2.17499
B2M	0.00502667	-0.546393	2.29872		ANKRD17	0.000239082	-0.461427	3.62145		LARGE	0.00376537	-0.265131	2.42419
B3GNT2	0.000139007	-0.477023	3.85696		ANKRD29	0.00913587	-0.149426	2.03925		GLIS3	0.00480446	-0.26523	2.31836
BCOR	0.00257121	-0.540825	2.58986		AQP8	0.00616518	-0.17958	2.21005		HOXC11	0.00232867	-0.265744	2.63289
C18orf8	0.00811459	-0.499666	2.09073		ARMCX3	0.00403944	-0.269011	2.39368		ZNF668	0.000460275	-0.272636	3.33698
C9orf116	0.00313772	-0.320958	2.50339		ATF6	0.00714964	-0.21599	2.14572		SLC39A9	0.00995983	-0.277739	2.00175
CAPZA1	0.00817047	-0.445895	2.08775		ATG9A	0.00094194	-0.349906	3.02598		ENTPD3	0.00530677	-0.28447	2.27517
CASP10	0.00830299	-0.315569	2.08077		ATP2C1	0.000409576	-0.474205	3.38766		PPHLN1	0.00693004	-0.287805	2.15926
CHIC2	0.00903391	-0.400778	2.04412		ATP5J2-PTCD1	0.000540232	-0.427052	3.26742		TAP2	0.00851602	-0.288543	2.06976
CHMP7	0.000774717	-0.27706	3.11086		ATP5SL	0.00373581	-0.346237	2.42761		ARPC5	0.00843965	-0.295513	2.07368
CHP1	0.00382934	-1.00919	2.41688		B3GNT2	0.00986886	-0.283329	2.00573		GPC4	0.00686712	-0.307166	2.16323
CLCN5	0.00199712	-0.319938	2.6996		B4GALT1	0.000325439	-0.351514	3.48753		SH3KBP1	0.00273088	-0.313489	2.5637
CUX1	0.0022367	-0.351739	2.65039		BACH2	0.00972999	-0.18386	2.01189		ADAMTS9	0.00125026	-0.315821	2.903
DENND4B	0.00192517	-0.223706	2.71553		BBX	1.37485e-05	-0.376947	4.86175		SBNO2	0.00828297	-0.321697	2.08181
DMBX1	0.00294487	-0.328276	2.53093		BCL11A	7.52016e-05	-0.420046	4.12377		DOT1L	0.000400039	-0.343163	3.3979
DUSP18	0.00306495	-0.287835	2.51358		BCL6	0.00727072	-0.268733	2.13842		ST3GAL4	0.00592073	-0.346176	2.22762
EDF1	0.000335987	-0.488225	3.47368		BDKRB1	0.00262544	-0.227717	2.5808		STX3	0.00956047	-0.346803	2.01952
ELF5	0.00605321	-0.294906	2.21801		BRD2	0.00234553	-0.408313	2.62976		CXorf49	0.00959563	-0.353996	2.01793
ETV6	0.00297693	-0.449154	2.52623		BRIP1	0.00152617	-0.32698	2.8164		ARMC4	0.0039119	-0.363764	2.40761
FADD	0.00387992	-0.312423	2.41118		C10orf131	0.00991616	-0.164855	2.00366		FBXW7	0.00318703	-0.400796	2.49661
FAM193A	0.000106671	-0.433402	3.97195		C10orf2	1.51197e-07	-0.446641	6.82046		SNX14	0.00266934	-0.403595	2.5736
FAM208B	0.00598243	-0.221357	2.22312		C1GALT1	2.94286e-06	-0.829195	5.53123		CDH1	0.000807377	-0.495901	3.09292
FAM73B	0.00740652	-0.661662	2.13039		C1GALT1C1	0.00170369	-0.64592	2.76861		PTPN1	7.55264e-05	-0.512457	4.1219
FEM1B	0.000212849	-0.467646	3.67193		C4BPB	0.0014917	-0.216933	2.82632		EIF2AK4	0.000977684	-0.578321	3.0098
FGF12	0.00698386	-0.249886	2.1559		C7orf26	0.00343581	-0.204173	2.46397		PTPN2	0.00123745	-0.623688	2.90747
GCNT1	0.0029214	-0.4033	2.53441		CAPN15	0.00843646	-0.129476	2.07384		TSC2	0.000239813	-0.70757	3.62013
GIT1	0.00415637	-0.356134	2.38129		CARS2	0.00414673	-0.287294	2.38229
GMEB1	0.000633574	-0.41333	3.1982		CCDC166	0.0040466	-0.204512	2.39291
HAX1	0.000758862	-0.584144	3.11984		CD81	0.00135381	-0.236232	2.86844
HECTD1	2.18025e-05	-0.501203	4.66149		CDH18	0.00625102	-0.215849	2.20405
HSP90AB1	0.000952945	-0.444213	3.02093		CDK19	0.00227538	-0.340053	2.64295
HSPBAP1	0.00370303	-0.199145	2.43144		CFLAR	9.29737e-08	-0.422099	7.03164
HTR3D	0.00489723	-0.265052	2.31005		CHD6	0.000606894	-0.312384	3.21689
IDH3A	0.00175003	-0.449509	2.75695		CHD7	5.64723e-05	-0.384923	4.24816
IMMP2L	0.000757997	-0.558313	3.12033		CHMP1B	0.00609071	-0.20704	2.21533
IRF1	0.00644069	-0.334433	2.19107		CMAS	6.83396e-05	-0.442676	4.16533
ITGB2	0.00357865	-0.473954	2.44628		CNOT4	0.00120049	-0.319487	2.92064
L3MBTL2	0.000457381	-0.487059	3.33972		CNST	0.00348278	-0.218128	2.45807
LRP10	0.00140343	-0.41836	2.85281		COA3	0.00954504	-0.205126	2.02022
LSMEM1	0.00164933	-0.261174	2.78269		COA7	0.000110531	-0.690961	3.95652
MAN2A1	0.0015617	-0.470456	2.8064		COQ3	7.7958e-05	-0.372133	4.10814
MORN2	0.00998006	-0.356773	2.00087		COX17	0.00726271	-0.258298	2.1389
MTF2	0.00325969	-0.282042	2.48682		COX18	7.91471e-06	-0.443551	5.10156
NADK2	0.00150604	-0.293766	2.82216		COX19	0.0066492	-0.320934	2.17723
NCOA5	0.000104393	-0.687566	3.98133		COX5B	0.000431974	-0.336152	3.36454
